# Supplementary material for: Effects of a Poetry Intervention on Emotional Wellbeing in Hospitalized Pediatric Patients
Source: Oxford University Press journal article supplement (doi:10.1542/hpeds.2020-002535), 2021-03-01
Supplement: hpeds_2020-002535supplementarydata.pdf [file hpeds_2020-002535supplementarydata.pdf]

## Supplemental Information

### WRITING PROMPTS AND POETRY ACTIVITIES

**1) Take 1 word and come up with as many words that rhyme with it!**

**2) Fill-in-the-blank “mad lib poetry” haiku:**

5 syllables  
7 syllables  
5 syllables

Give 3 nouns:

1. adjective, 2. verbs.

Let’s make a poem!

Today the (noun)  
(verb) to the (adjective) (noun)  
So I (verb) with (noun)

**3) Use your first name and make a poem, with each line starting with a letter in your name.**

For example, here is a quick poem using the name Sam:

Super  
Awesome

Minion

#### Questions to Spur Inspiration for Writing Poetry

*Reflecting on...Strength:*

- When you feel down, what cheers you up?
- Can you think of a time when someone was there for you when you needed help?
- Was there a moment you helped someone? How?
- What do you think are your best strengths?

*Reflecting on...Favorite Things*

- What’s your favorite book? Who’s your favorite character in that book, and why?
- If you’re singing in the shower, what song are you singing?

- What’s the best family vacation that you’ve been on?
- What’s your favorite thing to do on Saturdays or Sundays?

*Reflecting on...People*

- Who are the most important people in your life, and why?
- In 3 words, how would your friends describe you?
- In 3 words, how would you describe yourself?
- What’s a fun fact or hidden talent that most people don’t know about you?

*Reflecting on...Challenges and Joys*

- What is the most beautiful thing you have ever seen?
- What has been the most challenging part of your illness or time in the hospital?
- What are you most grateful for?
